# Supplementary material for: Mortality in Patients With Nonfunctional Adrenal Tumors
Source: PubMed Central journal article supplement (PMC10294015; doi:10.1001/jamainternmed.2023.2442), 2023-06-26
Supplement: jamainternmed-e232442-s001.pdf [file jamainternmed-e232442-s001.pdf]

## Supplemental Online Content

Patrova J, Mannheimer B, Lindh JD, Falhammar H. Mortality in patients with nonfunctional adrenal tumors. *JAMA Intern Med*. Published online June 26, 2023.  
doi:10.1001/jamainternmed.2023.2442

**eFigure 1.** Overall survival by sex

**eFigure 2.** Overall survival by age

**eFigure 3.** Overall survival by adrenalectomy

**eFigure 4.** Overall survival in sensitivity analyses

**eTable.** Potential confounders

This supplemental material has been provided by the authors to give readers additional information about their work.

**eFigure 1. Overall survival by sex: Panel A- women, Panel B- men.** Kaplan-Meier survival curves after post-hoc analysis showing mortality in subgroups of the 17,726 individuals with non-functional adrenal adenomas compared to 124,366 controls, Cox-proportional hazard ratio analysis, adjusted for age and possible confounders,  $P < 0.001$ . All individuals with malignancy discovered within the first three months after the diagnosis of the non-functional adrenal adenoma have been excluded.

A:

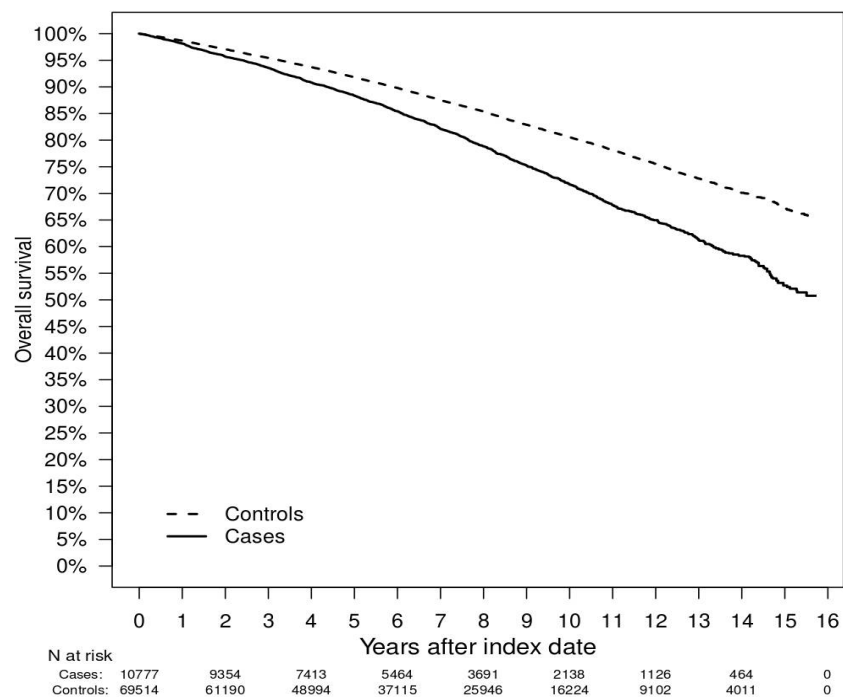

B:

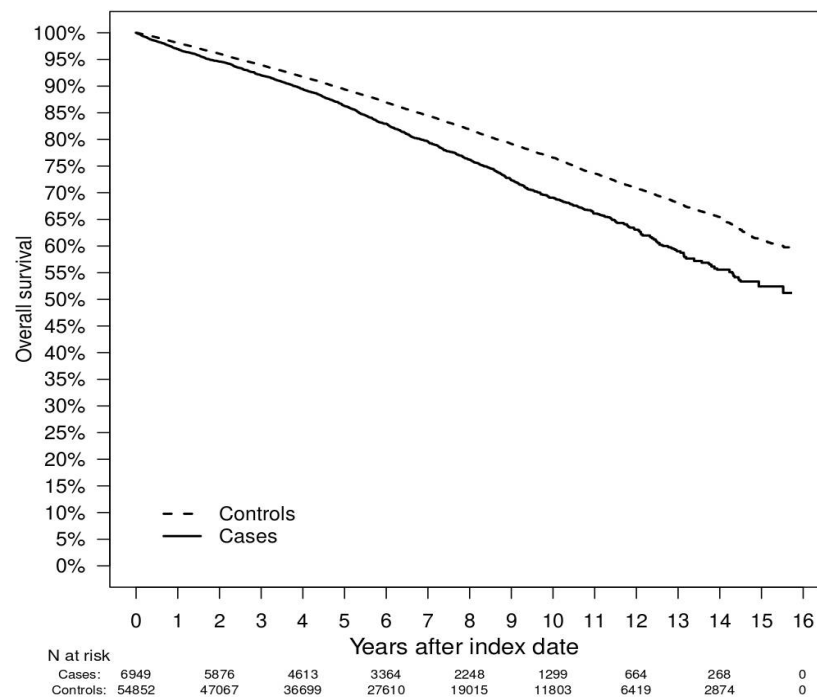

**eFigure 2. Overall survival by age: Panel A: < 65-year-old, Panel B: ≥ 65-year-old.** Kaplan-Meier survival curves after post-hoc analysis showing mortality in subgroups of the 17,726 individuals with non-functional adrenal adenomas compared to 124,366 controls, Cox-proportional hazard ratio analysis, adjusted for age and possible confounders,  $P < 0.001$ . All individuals with malignancy discovered within the first three months after the diagnosis of the non-functional adrenal adenoma have been excluded.

A:

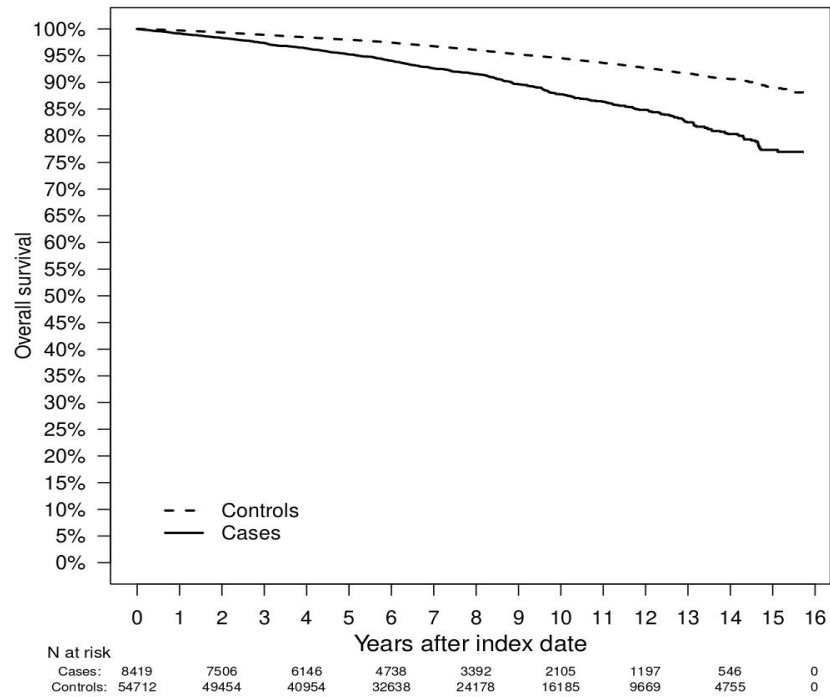

B:

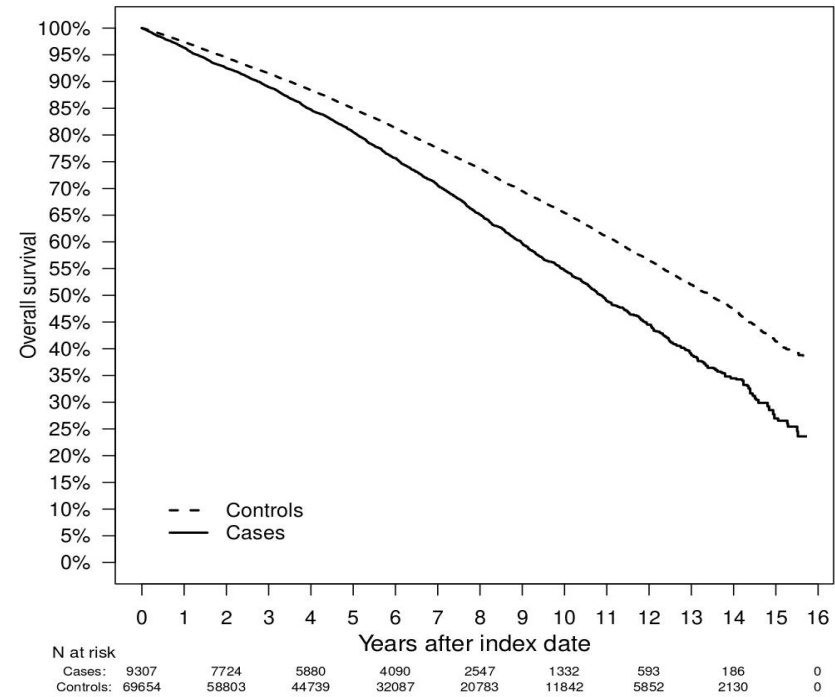

**eFigure 3. Overall survival by adrenalectomy: Panel A: no adrenalectomy, Panel B: adrenalectomy.** Kaplan-Meier survival curves after post-hoc analysis showing mortality in subgroups of the 17,726 individuals with non-functional adrenal adenomas compared to 124,366 controls, Cox-proportional hazard ratio analysis, adjusted for age and possible confounders, P-value in Panel A <0.001, P-value in Panel B = 0.03. All individuals with malignancy discovered within the first three months after the diagnosis of the non-functional adrenal adenoma have been excluded.

A:

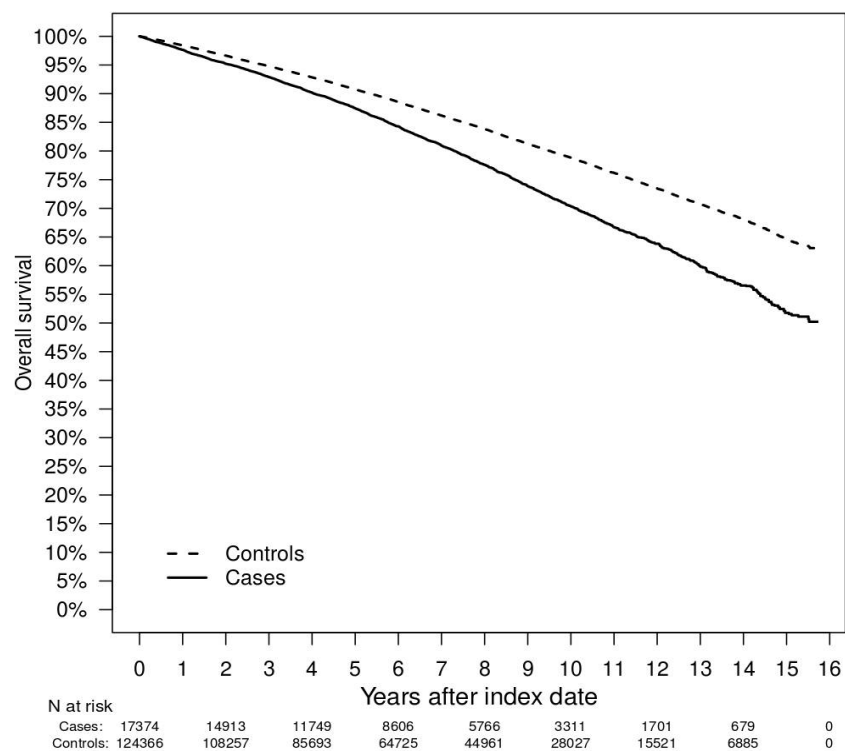

B:

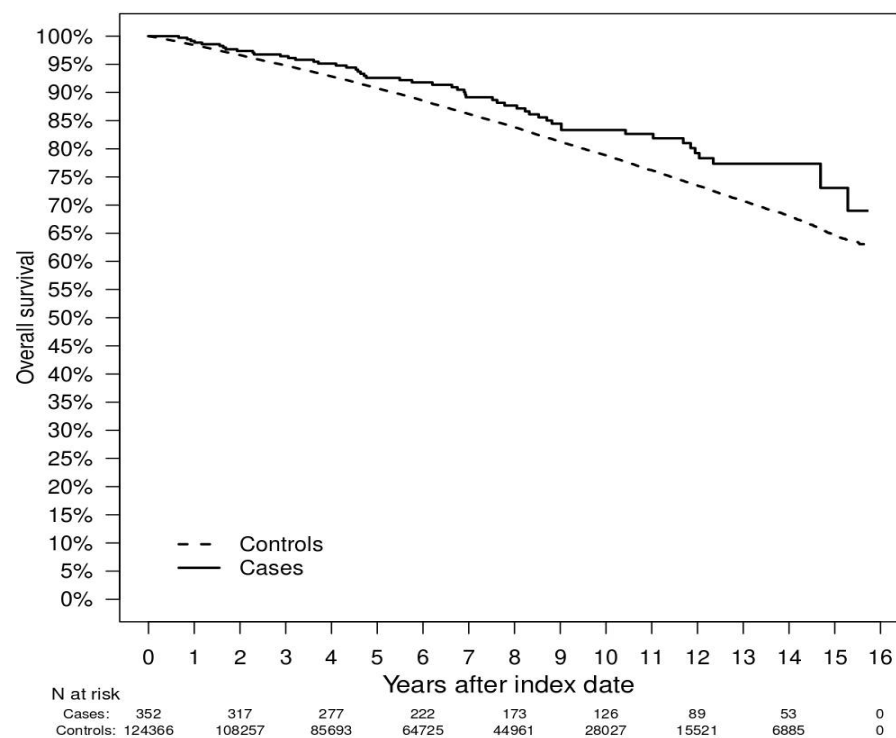

**eFigure 4. Overall survival in sensitivity analyses: Panel A: acute appendicitis, Panel B: gallbladder, biliary tract and**

**pancreas diseases.** Panel A: Kaplan-Meier survival curves after sensitivity analysis showing mortality in 155 individuals with appendicitis and non-functional adrenal adenomas compared to 2,154 controls with appendicitis. Panel B: Kaplan-Meier survival curves after sensitivity analysis showing mortality in 802 individuals with non-functional adrenal adenomas and gallbladder and/or biliary tract and/or pancreas diseases compared to 10,213 controls with gallbladder and/or biliary tract and/or pancreas disease. P-value in Panel A and B <0.001. All individuals with malignancy discovered within the first three months after the diagnosis of the non-functional adrenal adenoma have been excluded.

A:

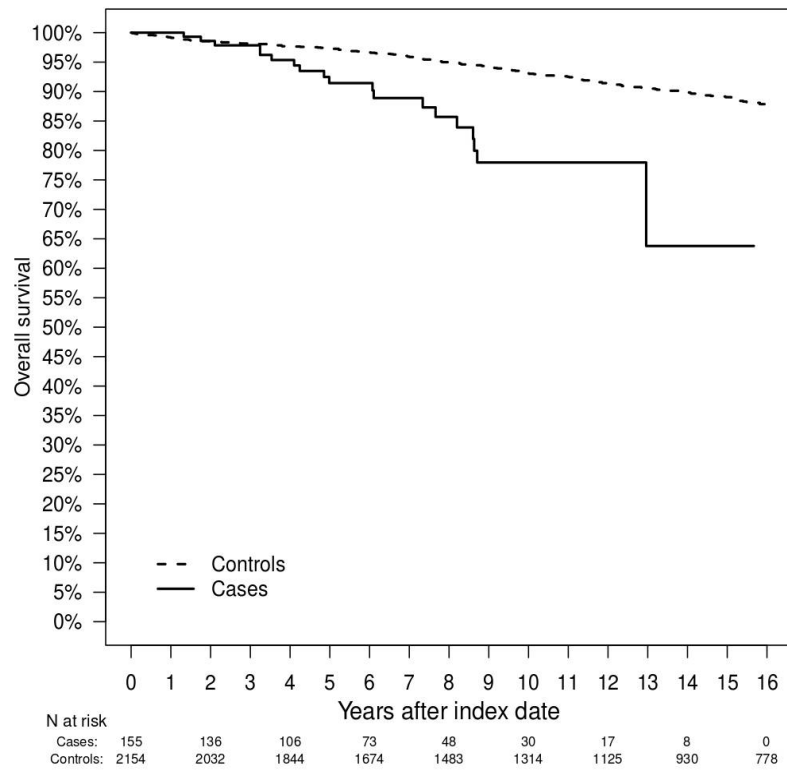

B:

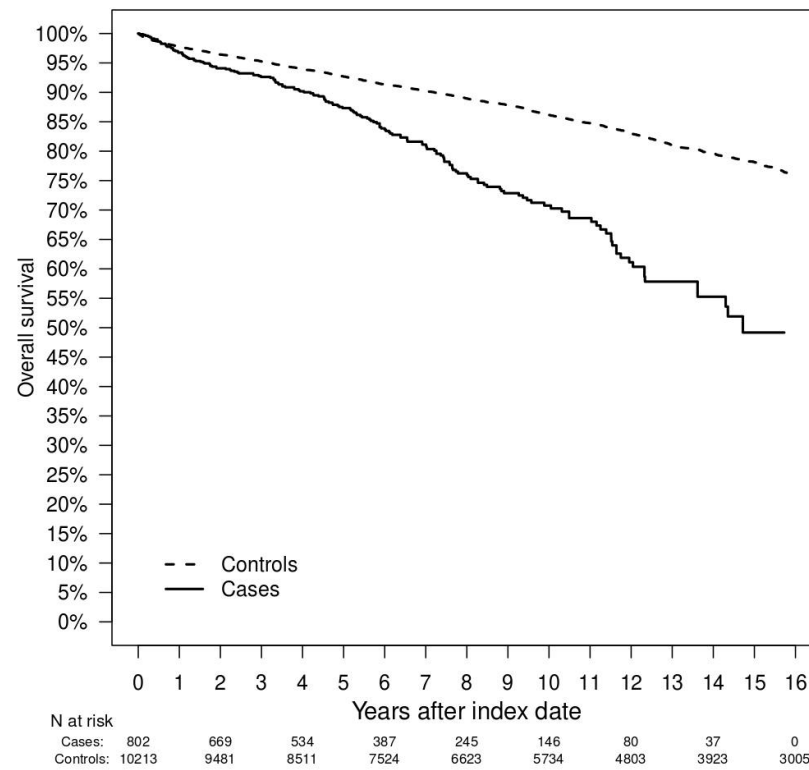

**eTable 1. Potential confounders**

| <b>Confounder</b>                           | <b>Composite variables</b>                                                                                                                                                                                                                                                                                                           | <b>ICD-10 code</b>                               |
|---------------------------------------------|--------------------------------------------------------------------------------------------------------------------------------------------------------------------------------------------------------------------------------------------------------------------------------------------------------------------------------------|--------------------------------------------------|
| <b>Renal diseases</b>                       | Renal failure                                                                                                                                                                                                                                                                                                                        | N17-19                                           |
| <b>Infections</b>                           | Sepsis<br>Pneumonia<br>Meningitis, encephalitis, brain abscess                                                                                                                                                                                                                                                                       | A41<br>J18<br>G00 - G07                          |
| <b>Cardiovascular diseases</b>              | Ischemic heart disease<br>Heart failure<br>Thromboembolism                                                                                                                                                                                                                                                                           | I20-I25<br>I50<br>I802 and I26                   |
| <b>Gastrointestinal diseases</b>            | Gallbladder, biliary tract and pancreas diseases<br>Inflammatory bowel disease<br>Liver failure / liver diseases                                                                                                                                                                                                                     | K80-K87<br><br>K51, K50<br>K70-77                |
| <b>Cerebrovascular diseases</b>             | Nontraumatic subarachnoid hemorrhage<br>Nontraumatic intracerebral hemorrhage<br>Other and unspecified nontraumatic intracranial hemorrhage<br>Cerebral infarction<br>Stroke, not specified as hemorrhage or infarction<br>Sequelae of cerebrovascular disease                                                                       | I60<br>I61<br>I62<br><br>I63<br>I64<br>I69       |
| <b>Other diseases</b>                       | Chronic obstructive pulmonary disease / Pulmonary emphysema                                                                                                                                                                                                                                                                          | J44 and/or J43                                   |
| <b>Alcohol misuse</b>                       |                                                                                                                                                                                                                                                                                                                                      | E24.4, F10, G62.1, G72.1, I42.6, K29.2, K70, K86 |
| <b>Socioeconomic factors</b>                | Education:<br>Preschool education<br>Preschool class education<br>Primary or lower secondary education<br>Upper secondary education<br>Bachelor's level education<br>Master's level education<br>Postgraduate education<br><br>Income (Disposable income for one person in SEK)<br><br>Unemployment (Number of days in unemployment) |                                                  |
| <b>Number of prolonged hospitalizations</b> | ≥3 days hospitalization at least once                                                                                                                                                                                                                                                                                                |                                                  |
