# Supplementary material for: Mortality in Patients With Nonfunctional Adrenal Tumors
Source: PubMed Central journal article supplement (PMC10294015; doi:10.1001/jamainternmed.2023.2442), 2023-06-26
Supplement: jamainternmed-e232442-s002.pdf [file jamainternmed-e232442-s002.pdf]

## Data Sharing Statement

Patrova. Mortality in Patients with Nonfunctional Adrenal Tumors. *JAMA Intern Med.* Published June 26, 2023. doi:10.1001/jamainternmed.2023.2442

### Data

**Data available:** Yes

**Data types:** Data (not involving human participants)

**How to access data:** [jekaterina.patrova@ki.se](mailto:jekaterina.patrova@ki.se)

**When available:** With publication

### Supporting Documents

**Document types:** None

### Additional Information

**Who can access the data:** Researchers whose proposed use of the data has been approved.

**Types of analyses:** For a specified purpose

**Mechanisms of data availability:** After approval of a proposal, with a signed data access agreement
